# Supplementary material
Source: MDPI journal article supplement (https://www.mdpi.com/2073-4352/13/5/745)
Supplement: s1 [file s1 › crystals-2365252-supplementary.pdf]

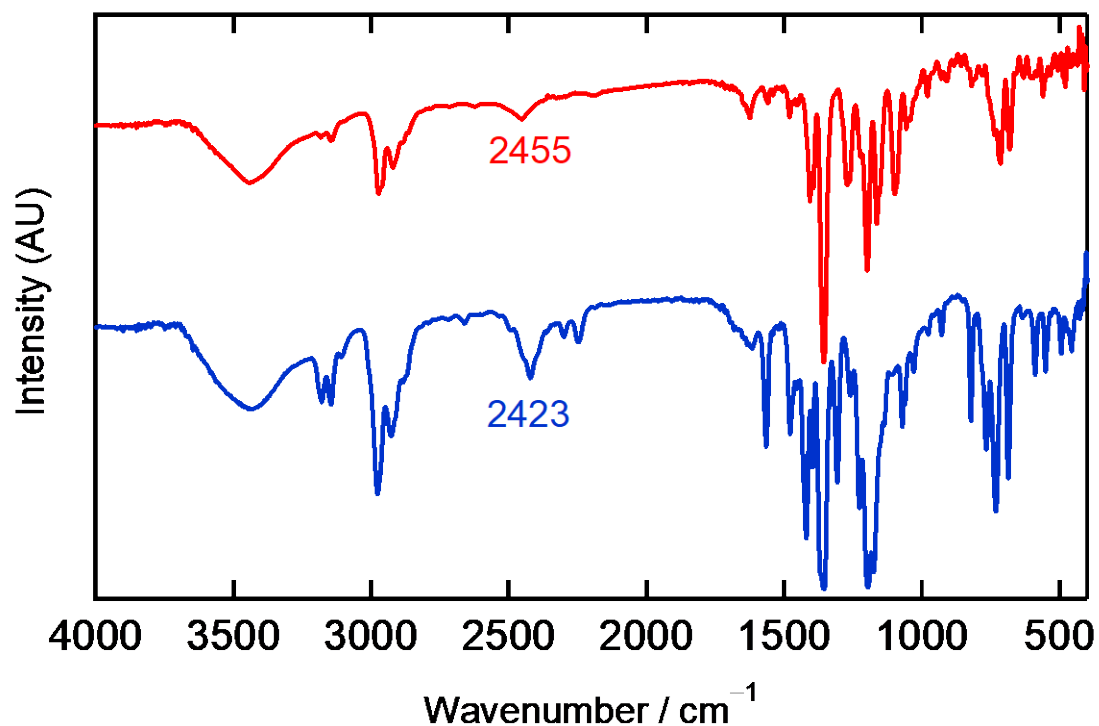

**Figure S1** IR spectra of [Tl(Tm<sup>tBu</sup>)]<sub>2</sub>·2H<sub>2</sub>O (red trace) and [In(Tm<sup>tBu</sup>)<sub>2</sub>](InCl<sub>4</sub>) (blue trace) at room temperature.

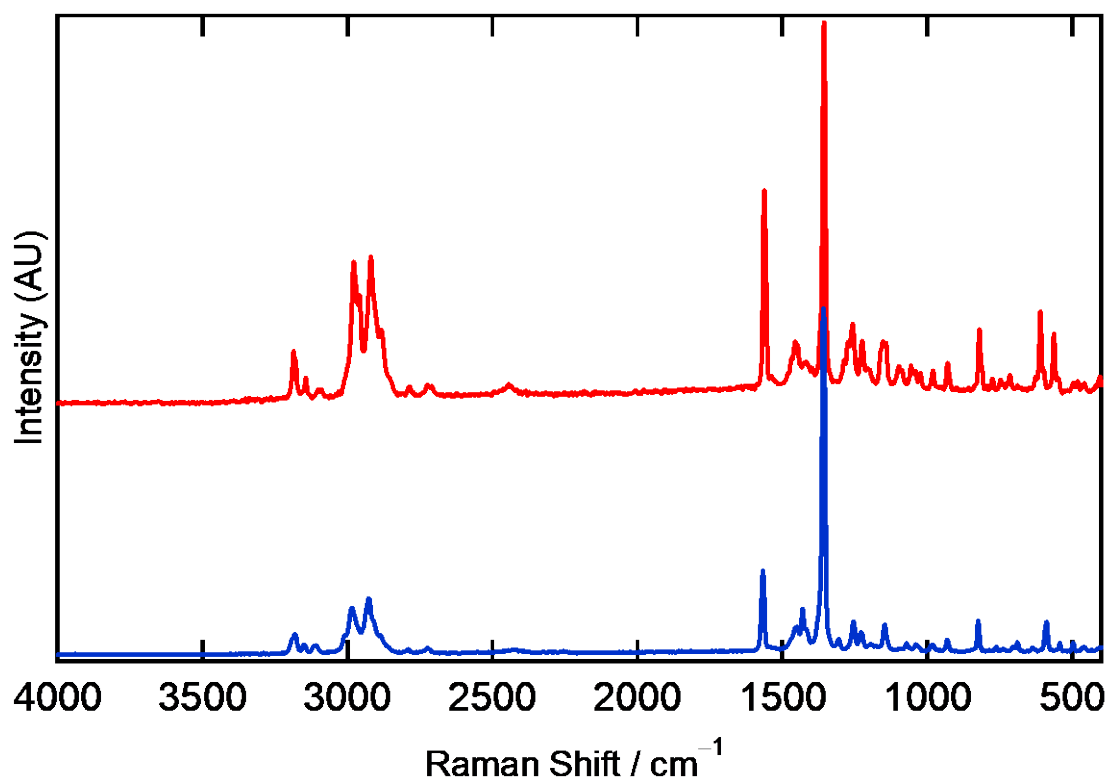

**Figure S2** FT-Raman spectra of [Tl(Tm<sup>tBu</sup>)]<sub>2</sub>·2H<sub>2</sub>O (red trace) and [In(Tm<sup>tBu</sup>)<sub>2</sub>](InCl<sub>4</sub>) (blue trace) at room temperature.

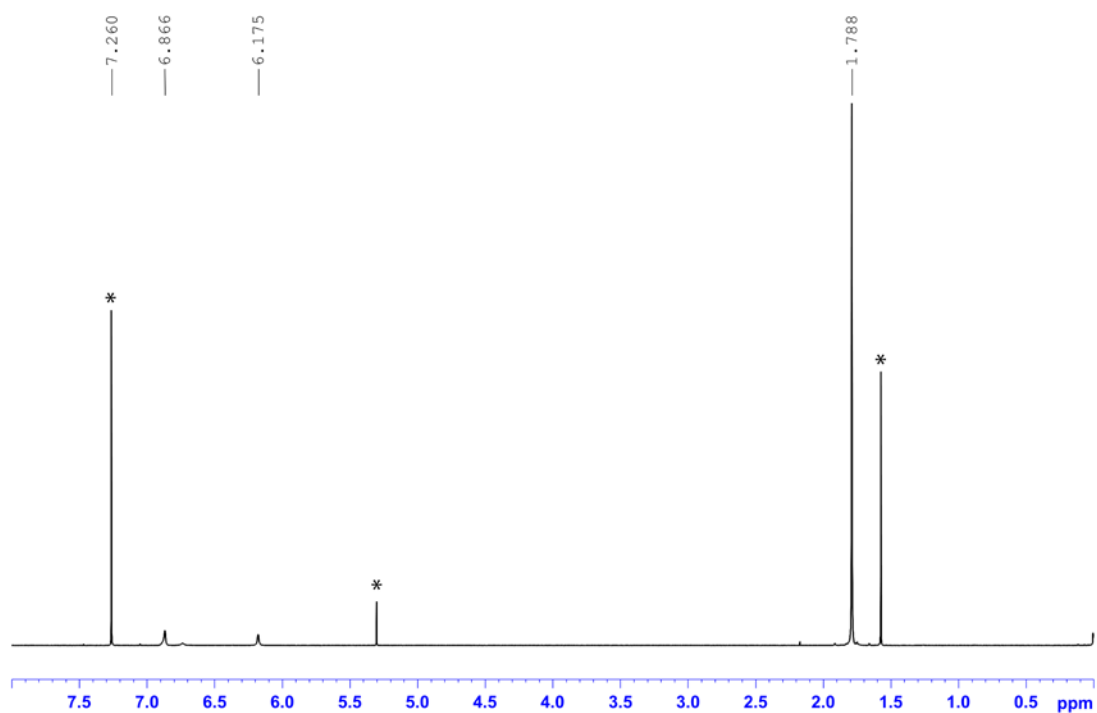

**Figure S3**  $^1\text{H}$ -NMR spectrum of  $[\text{Tl}(\text{Tm}^{\text{tBu}})]_2 \cdot 2\text{H}_2\text{O}$  at room temperature in  $\text{CDCl}_3$ . (\* marks solvents and water peaks).

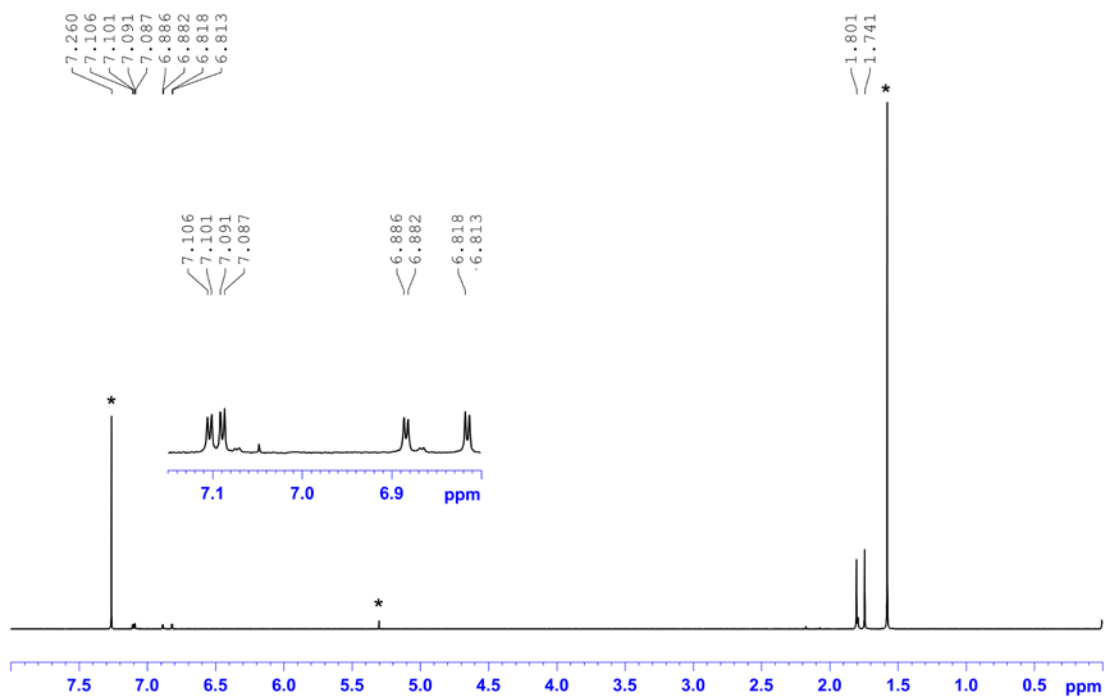

**Figure S4**  $^1\text{H}$ -NMR spectrum of  $[\text{In}(\text{Tm}^{\text{tBu}})_2](\text{InCl}_4)$  at room temperature in  $\text{CDCl}_3$ . (\* marks solvents and water peaks).

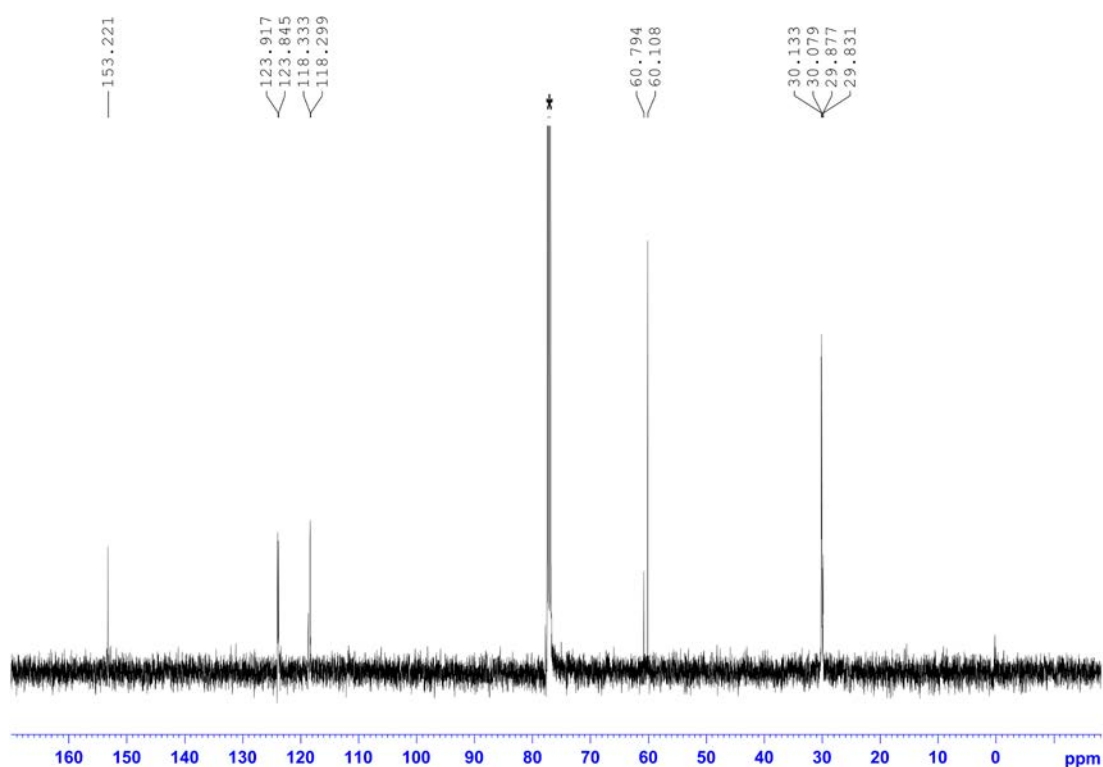

**Figure S5**  $^{13}\text{C}$ -NMR spectrum of  $[\text{In}(\text{Tm}^{\text{tBu}})_2](\text{InCl}_4)$  at room temperature in  $\text{CDCl}_3$ . (\* marks solvent peaks).

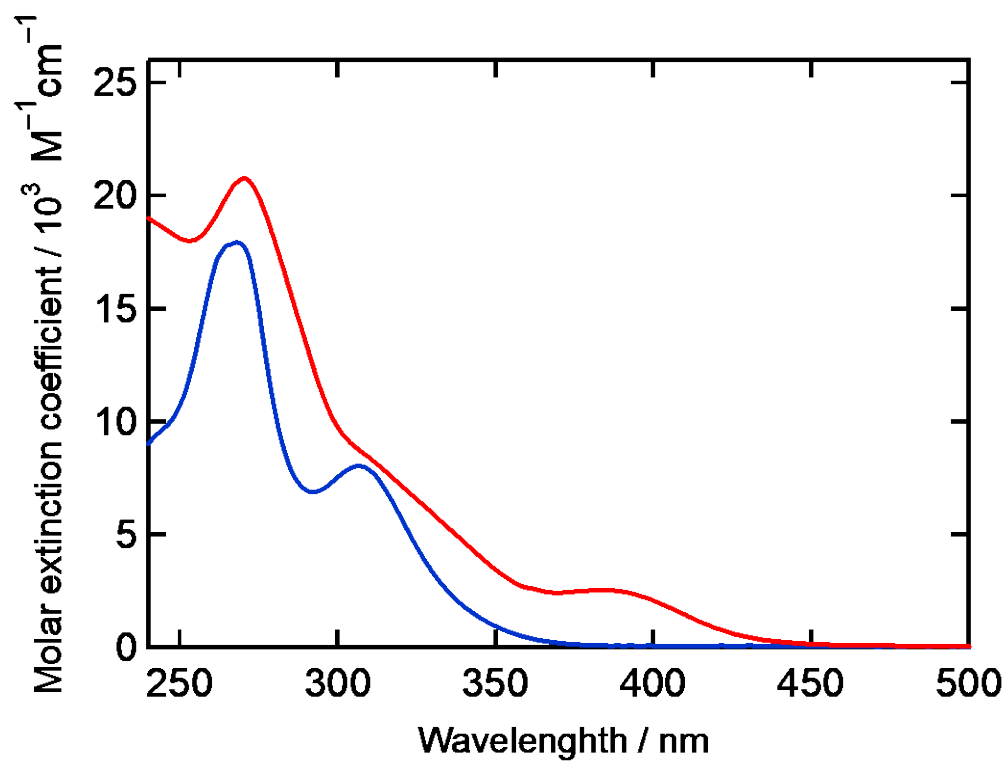

**Figure S6** UV-Vis spectra of  $[\text{Tl}(\text{Tm}^{\text{tBu}})_2] \cdot 2\text{H}_2\text{O}$  (red trace) and  $[\text{In}(\text{Tm}^{\text{tBu}})_2](\text{InCl}_4)$  (trace line) in  $\text{CH}_2\text{Cl}_2$  at room temperature.
